# Supplementary figures and images for: Spontaneous neurotransmission signals through store-driven Ca2+ transients to maintain synaptic homeostasis
Source: eLife journal article supplement (doi:10.7554/elife.09262), 2015-07-24

A

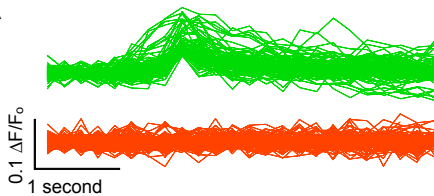

B

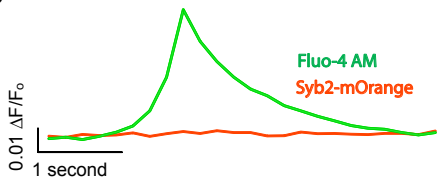

Supplement: supp [file elife_poa_e09262_Figure_2_figure_supplement_1.pdf › elife_poa_e09262_Figure_2_figure_supplement_1.pdf]

A

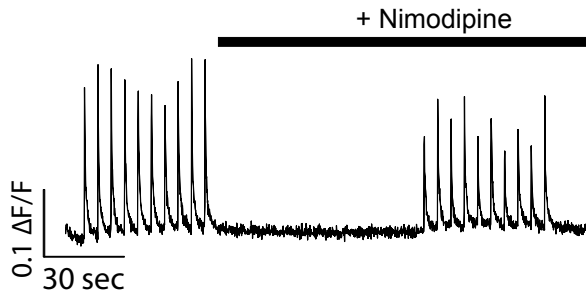

B

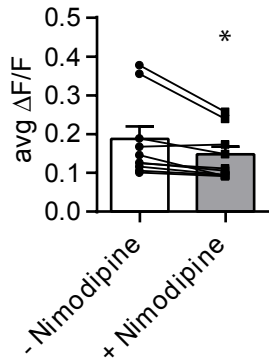

Supplement: supp [file elife_poa_e09262_Figure_4_figure_supplement_1.pdf › elife_poa_e09262_Figure_4_figure_supplement_1.pdf]

A

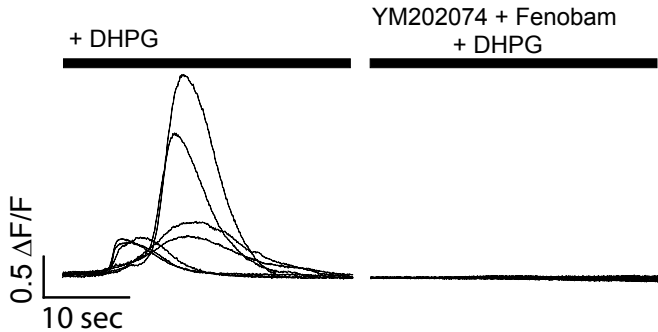

# B

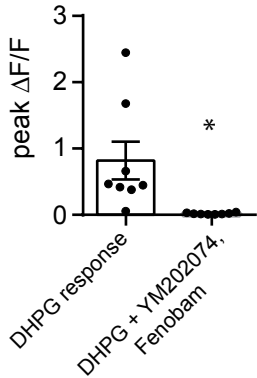

Supplement: supp [file elife_poa_e09262_Figure_4_figure_supplement_2.pdf › elife_poa_e09262_Figure_4_figure_supplement_2.pdf]
